# Supplementary material for: Observation of site-controlled localized charged excitons in CrI3/WSe2 heterostructures
Source: PubMed Central journal article supplement (PMC7599320; doi:10.1038/s41467-020-19262-2), 2020-10-30
Supplement: 41467_2020_19262_MOESM1_ESM.pdf [file 41467_2020_19262_MOESM1_ESM.pdf]

# Supplementary Information for Observation of site-controlled localized charged excitons in CrI<sub>3</sub>/WSe<sub>2</sub> heterostructures

Arunabh Mukherjee<sup>1</sup>, Kamran Shayan<sup>1</sup>, Lizhong Li<sup>2,3</sup>, Jie Shan<sup>2,3,4</sup>, Kin Fai Mak<sup>2,3,4</sup> & A. Nick Vamivakas<sup>1,5,6,7,\*</sup>

<sup>1</sup>*The Institute of Optics, University of Rochester, Rochester, New York 14627, USA.*

<sup>2</sup>*School of Applied and Engineering Physics, Cornell University, Ithaca, New York 14853, USA.*

<sup>3</sup>*Kavli Institute at Cornell for Nanoscale Science, Ithaca, New York 14853, USA.*

<sup>4</sup>*Laboratory of Atomic and Solid State Physics, Cornell University, Ithaca, NY, USA*

<sup>5</sup>*Materials Science, University of Rochester, Rochester, NY, USA*

<sup>6</sup>*Department of Physics and Astronomy, University of Rochester, Rochester, NY, USA*

<sup>7</sup>*Center for Coherence and Quantum Optics, University of Rochester, Rochester, NY, USA*

*\*E-mail: [nick.vamivakas@rochester.edu](mailto:nick.vamivakas@rochester.edu)*

## 1 Optical micrograph of the device

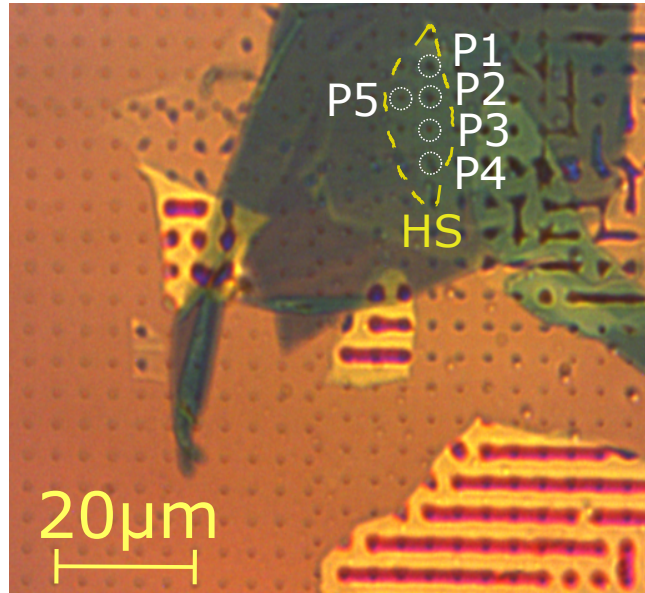

**Supplementary Figure 1: Optical image of the van der Waals heterostructure device**

Here we show an optical microscope image of the van der Waals heterostructure(HS) on which all the measurements were performed. The boundary of the  $\text{CrI}_3$  and  $\text{WSe}_2$  overlap region has been marked with yellow dashed line. We found 0D  $\text{X}^+$  emissions at nano-pillar locations identified as P1-P5 in white dashed circles.

## 2 Magnetic circular dichroism(MCD) in bilayer $\text{CrI}_3$

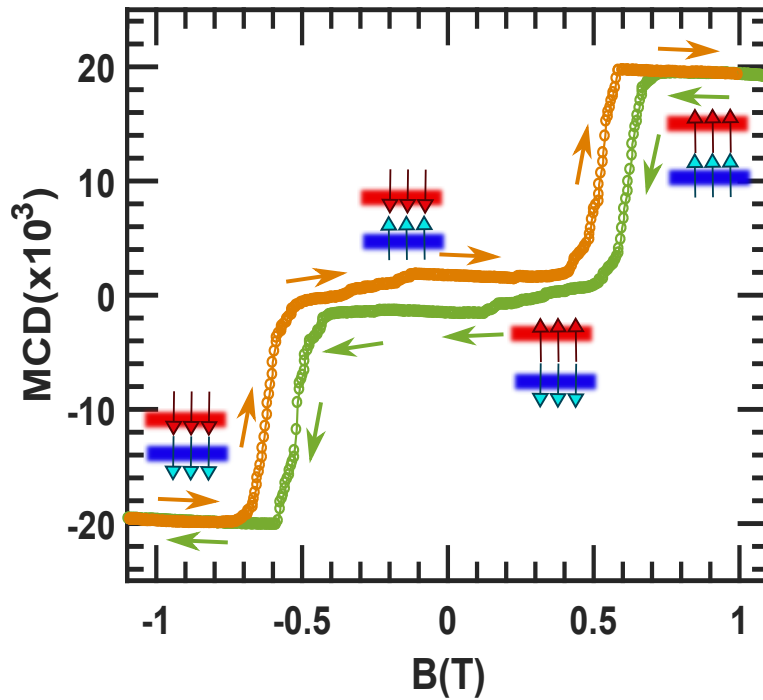

**Supplementary Figure 2. MCD in bilayer  $\text{CrI}_3$**

We have performed MCD measurements on bilayer  $\text{CrI}_3$ . Spin-flip transitions cause a step-like change in MCD signal as a function of applied magnetic field. The fields at which such changes occur agree well in the MCD and PL polarization( $\rho$ ) measurements shown in Fig. 2(c) of the main manuscript.

### 3 Measured photo-luminescence spectra for other 0D $X^+$

In this figure we have shown the PL spectra from the 5 nano-pillar sites that were identified in Supplementary Figure 1. In Supplementary Figure 3(a) The PL spectra at no applied magnetic field is shown. We can see multiple 0D  $X^0$  as well as 0D  $X^+$  at every pillar site. The presence of multiple sharp emission lines is a tell-tale signature of strain due to nano-pillars. Supplementary Figure 3(b) shows magneto-PL spectra at pillar site 5. We clearly see characteristic X shaped dispersion for the emitters marked 0D  $X^+$ . In the main manuscript we have studied one 0D  $X^+$  from pillar 4. In contrast, the emitters marked 0D  $X^0$  show a more quadratic dispersion at low fields and a finite zero field splitting because of un-quenched electron and hole exchange interactions.

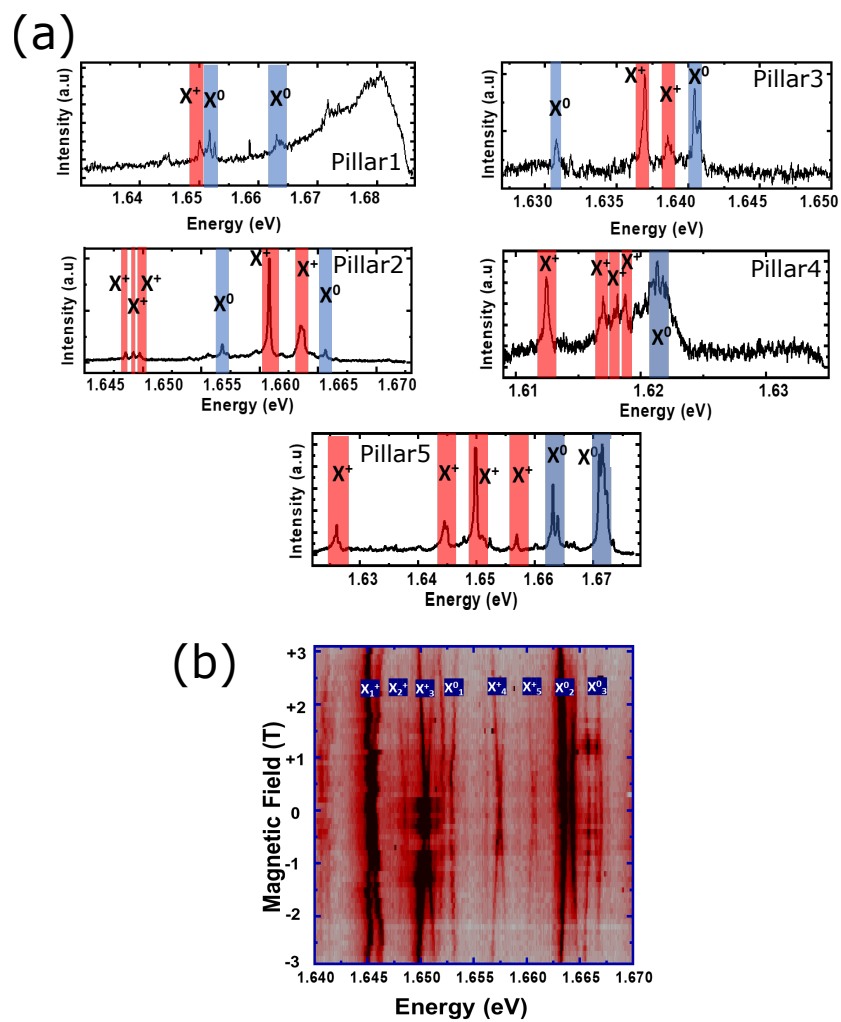

Supplementary Figure 3 (a) PL spectra at zero applied field for five different nanopillar sites

(b) An exemplary magneto-PL spectra taken at Pillar 5

#### 4 FSS of 0D X<sup>0</sup>

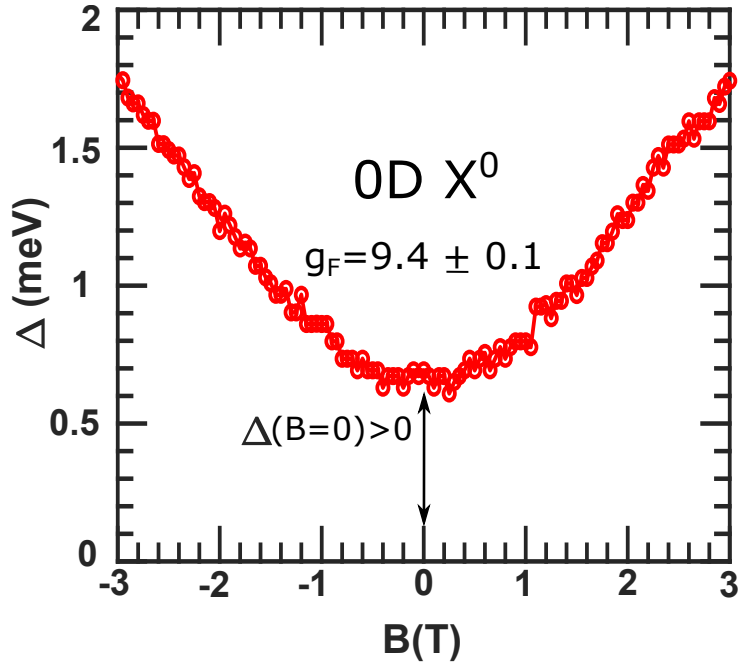

**Supplementary Figure 4. Fine Structure Splitting of 0D X<sup>0</sup> as a function of B**

To differentiate between magneto-optical behaviors of 0D X<sup>+</sup> and 0D X<sup>0</sup>, we also performed PL spectroscopy on 0D X<sup>0</sup> at various B fields in the Faraday configuration. As clearly shown on recent studies, the existence of the anisotropic electron–hole exchange interaction in 0D X<sup>0</sup> leads to a doublet spectra at zero magnetic field, respectively. Supplementary Figure 4 displays a typical PL intensity map as function of applied B fields for 0D X<sup>0</sup> which is trapped in the shallow confinement potential induced by localized strain pockets formed by pillars. As expected, a zero field FSS of approximately 800  $\mu\text{eV}$  is clearly observable in 0D X<sup>0</sup>, which is consistent with previously reported a zero field FSS ranged between 500  $\mu\text{eV}$  and 1000  $\mu\text{eV}$ . In addition, 0D X<sup>0</sup> shows a quadratic dispersion behavior for small fields, while 0D X<sup>+</sup> as mentioned earlier exhibits

X shape dispersion behavior. In 0D  $X^0$ , the FSS increases as function of applied magnetic field by  $\Delta E = \sqrt{(\Delta_0)^2 + (g_F \mu_B B)^2}$ , wherein  $\Delta_0$  is a zero-field FSS. We find that this 0D  $X^0$  has the Landé g-factor of  $9.4 \pm 0.1$ , which is comparable to previous reports for localized 0D  $X^+$  Landé g-factors in  $WSe_2$

### 5 Pump power dependent intensity of 0D $X^+$

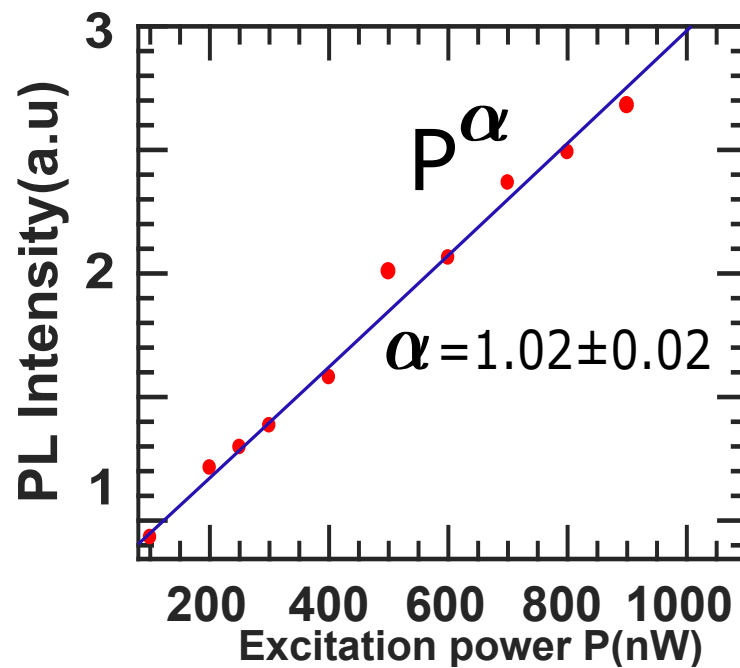

**Supplementary Figure 5. Pump power dependent intensity of 0D  $X^+$**

We have performed pump-power dependent measurements on the intensity of 0D  $X^+$ . We found that the increase in intensity is close to linear, thereby ruling out the possibility of charged bi-excitonic species.
